# Supplementary material for: Protocol for a parallel cluster randomized trial of a participatory tailored approach to reduce overuse of antibiotics at hospital discharge: the ROAD home trial
Source: Springer Nature journal article supplement (doi:10.1186/s13012-024-01348-w), 2024-03-04
Supplement: MOESM1 [file 26811152]

## Additional File 1

Table. ROAD Home Implementation Strategies

| <b>ERIC<sup>1</sup><br/>Domain</b>             | <b>Use Evaluative and Iterative Strategies</b>                                                                                                                                                                                                                                               |                                                                                                                                                             | <b>Adapt and Tailor to<br/>Context</b>                                                                                                                                                                                                                                 | <b>Provide Interactive<br/>Assistance</b>                                                                                                                                                                                                                                                                                                                                  | <b>Develop Stakeholder<br/>Interrelationships</b>                                                                                                                                                                                                                                      |
|------------------------------------------------|----------------------------------------------------------------------------------------------------------------------------------------------------------------------------------------------------------------------------------------------------------------------------------------------|-------------------------------------------------------------------------------------------------------------------------------------------------------------|------------------------------------------------------------------------------------------------------------------------------------------------------------------------------------------------------------------------------------------------------------------------|----------------------------------------------------------------------------------------------------------------------------------------------------------------------------------------------------------------------------------------------------------------------------------------------------------------------------------------------------------------------------|----------------------------------------------------------------------------------------------------------------------------------------------------------------------------------------------------------------------------------------------------------------------------------------|
| <i>Individual<br/>Strategies from<br/>ERIC</i> | -Conduct a local needs<br>assessment<br>-Assess for readiness and<br>identify barriers and<br>facilitators                                                                                                                                                                                   | -Develop a<br>formal<br>implementation<br>blueprint                                                                                                         | -Tailor strategies<br>-Promote adaptability                                                                                                                                                                                                                            | -Facilitation                                                                                                                                                                                                                                                                                                                                                              | -Identify and prepare<br>champions                                                                                                                                                                                                                                                     |
| <i>Specification</i>                           |                                                                                                                                                                                                                                                                                              |                                                                                                                                                             |                                                                                                                                                                                                                                                                        |                                                                                                                                                                                                                                                                                                                                                                            |                                                                                                                                                                                                                                                                                        |
| Actor                                          | ROAD Home research team<br>who are experts in antibiotic<br>stewardship at hospital<br>discharge.                                                                                                                                                                                            | ROAD Home<br>Research Team                                                                                                                                  | ROAD Home<br>Research Team;<br>Inner Setting<br>Implementation Leads                                                                                                                                                                                                   | ROAD Home Research<br>Team                                                                                                                                                                                                                                                                                                                                                 | ROAD Home Research<br>Team                                                                                                                                                                                                                                                             |
| Action                                         | Uses structured surveys to<br>ascertain contextual<br>determinants likely to<br>influence implementation;<br>facilitate discussion with<br>implementation leads about<br>barriers and facilitators to<br>discharge stewardship,<br>develops and shares a formal<br>implementation blueprint. | Use an<br>implementation<br>blueprint to be<br>filled out by<br>intervention<br>hospitals to<br>specify their<br>plans for<br>implementation<br>in advance. | Use information about<br>local needs, readiness,<br>determinants to create<br>customized suite of<br>weighted stewardship<br>strategies. Inner<br>Setting<br>Implementation Leads<br>have free choice of<br>what strategies to<br>implement if they total<br>3 points. | Provide support to Inner<br>Setting Implementation<br>Leads through prescrib-<br>ing performance data<br>analysis, provision of<br>customized suite, provi-<br>sion of implementation<br>blueprint; provision of<br>adaptable materials (e.g.<br>education, literature<br>reviews, expert steward-<br>ship guidance); ongoing<br>availability for<br>challenges that arise | Use a bundle of<br>strategies (implemen-<br>tation blueprint, needs<br>assessment, assessment<br>of readiness) to prepare<br>Inner Setting Implemen-<br>tation Leads to<br>implement stewardship<br>strategies in their<br>hospital to improve<br>discharge antibiotic<br>prescribing. |
| Target(s) of<br>Action                         | Inner setting implementation<br>leads – antimicrobial<br>stewardship stakeholders<br>(physician, pharmacist,<br>administrative leader).                                                                                                                                                      | Inner setting<br>implementation<br>leads                                                                                                                    | Inner setting<br>implementation leads;<br>Clinicians (indirectly)                                                                                                                                                                                                      | Inner setting<br>implementation leads                                                                                                                                                                                                                                                                                                                                      | Inner setting<br>implementation leads                                                                                                                                                                                                                                                  |

|                                 |                                                                                                                                                                                                                                                                                                                                                                  |                                                                                                                  |                                                                                                                                                                                                                                                                                  |                                                                                                                                                                                                                                                                                                                     |                                                                                                                                                                                                                                                                                           |
|---------------------------------|------------------------------------------------------------------------------------------------------------------------------------------------------------------------------------------------------------------------------------------------------------------------------------------------------------------------------------------------------------------|------------------------------------------------------------------------------------------------------------------|----------------------------------------------------------------------------------------------------------------------------------------------------------------------------------------------------------------------------------------------------------------------------------|---------------------------------------------------------------------------------------------------------------------------------------------------------------------------------------------------------------------------------------------------------------------------------------------------------------------|-------------------------------------------------------------------------------------------------------------------------------------------------------------------------------------------------------------------------------------------------------------------------------------------|
| Temporality                     | 18 months prior to local site implementation of selected stewardship strategies                                                                                                                                                                                                                                                                                  | 7 months prior to local site implementation                                                                      | 12 months prior to local site implementation                                                                                                                                                                                                                                     | 18 months prior to local site implementation; 12 month intervention period                                                                                                                                                                                                                                          | 18 months prior to local site implementation                                                                                                                                                                                                                                              |
| Dose                            | -1 survey with implementation leads to determine local needs, readiness, and identify potential barriers and facilitators<br>-Medical record review of discharge prescribing performance to inform stewardship targets                                                                                                                                           | -3 points of engagement with the blueprint: pre-intervention and 2 times during intervention – blueprint updates | -1-2-hour meeting between ROAD Home research team and implementation leads to discuss customized suite of stewardship strategies and provide instructions on how to fill out implementation blueprint                                                                            | -1-2-hour meeting between ROAD Home research team and implementation leads to discuss and select stewardship strategies to implement and provide instructions on how to fill out implementation blueprint<br><br>-3 1 hour in person meeting at HMS collaborative<br>-Ongoing feedback on implementation blueprints | -1-2-hour meeting between ROAD Home research team and implementation leads to discuss and select stewardship strategies to implement and provide instructions on how to fill out implementation blueprint<br><br>-Email feedback at one point in time on initial implementation blueprint |
| Implementation Outcome Affected | Acceptability<br>Feasibility<br>Fidelity                                                                                                                                                                                                                                                                                                                         | Feasibility<br>Fidelity                                                                                          | Acceptability<br>Feasibility<br>Fidelity                                                                                                                                                                                                                                         | Fidelity<br>Sustainment                                                                                                                                                                                                                                                                                             | Acceptability<br>Fidelity<br>Sustainment                                                                                                                                                                                                                                                  |
| Justification                   | Assessing a hospital's needs, resources, and priorities related to discharge stewardship will raise awareness of problems that can inform selection of strategies that lead to increased coherence between hospital context and stewardship strategies, leading to an increase in acceptability, feasibility, fidelity to the planned approach, and sustainment. |                                                                                                                  | Tailoring discharge stewardship strategies to each hospital's context will increase compatibility, increase alignment with existing organizational priorities (leading to increased acceptability), and decrease the impact of resource constraints on feasibility and fidelity. | Providing external facilitation through a QI collaborative that centralizes technical assistance and offers an opportunity to participate in a discharge stewardship intervention will increase motivation of hospitals to focus on this issue and decrease barriers to activate a                                  | Providing external facilitation to assist inner setting implementation leads to prepare for implementing discharge stewardship will increase their self-efficacy (capability) to lead change and save them time (opportunity), leading to increase in acceptability,                      |

|  |  |  |                                                                                                                                                                                                     |                            |
|--|--|--|-----------------------------------------------------------------------------------------------------------------------------------------------------------------------------------------------------|----------------------------|
|  |  |  | project in this area by providing stewardship tools that are accessible, well-designed and come from a source that is credible, leading to an increase in acceptability, fidelity, and sustainment. | fidelity, and sustainment. |
|--|--|--|-----------------------------------------------------------------------------------------------------------------------------------------------------------------------------------------------------|----------------------------|

<sup>1</sup>Expert Recommendations for Implementing Change (ERIC)
