# Supplementary material for: Protocol for a parallel cluster randomized trial of a participatory tailored approach to reduce overuse of antibiotics at hospital discharge: the ROAD home trial
Source: Springer Nature journal article supplement (doi:10.1186/s13012-024-01348-w), 2024-03-04
Supplement: MOESM2 [file 26811152]

## Additional File 2

### Figure. Example Implementation Blueprint

#### Self-Directed ROAD Home Implementation Blueprint

Please fill out completely and return to ROAD Home Study Team.

#### Goals – ROAD Home Strategies (3 points)

1. Updated Guidelines – Discharge Specific Recommendations (Tier 1, 1 point)
2. Audit & Feedback - Add Proactive Discussion of Discharge Antibiotics (Tier 2, 2 points)

Dates of Intervention Period: [DATES SELECTED BY HOSPITAL AND STUDY TEAM] Total Duration of Intervention: 12 months

| Goal and Deadline                                                                                               | Action Step                                                                                                          | Responsible Individual(s)                                      | Planned Timeline         | Anticipated Barriers                                                 | Strategies to Address Barriers                                                                                       |
|-----------------------------------------------------------------------------------------------------------------|----------------------------------------------------------------------------------------------------------------------|----------------------------------------------------------------|--------------------------|----------------------------------------------------------------------|----------------------------------------------------------------------------------------------------------------------|
| Update Guidelines to Include Discharge-Specific Recommendations<br>Update Guidelines by [DATE]                  | Gain consensus on oral de-escalation guidelines                                                                      | ASP Lead;<br>Pharmacy Stakeholders;<br>Formulary Committee     | Complete by [DATE]       | -Disagreement about antibiotic selections to highlight in guidelines | -Engage guideline stakeholders early<br>-ROAD Home team to provide updated evidence and materials                    |
|                                                                                                                 | Modify text in existing guidelines to state “recommended duration 3-5 days (including discharge prescription)”       | ASP Lead;<br>Pharmacy Stakeholders;<br>Guideline Committee; IT | Complete by [DATE]       | -Prioritization of this guideline change in a timely fashion         | -Engage guideline gatekeepers early<br>-Align with other planned guideline changes                                   |
|                                                                                                                 | Modify text in existing guidelines to include new oral de-escalation guidelines                                      | ASP Lead;<br>Pharmacy Stakeholders;<br>Guideline Committee; IT | Complete by [DATE]       | -Late disagreement with suggested changes                            | -Ensure all stakeholder engaged during consensus stage                                                               |
|                                                                                                                 | Circulate informational message letting key stakeholders know about changes made to guidelines                       | Site Coordinator                                               | Ongoing Monthly, [DATES] | -Email overload<br>-Reaching part-time or rotating staff             | -Alternatives to email – QR code at meetings or on signs<br>-Have messages come from leadership with supportive note |
| Audit and Provide Feedback – Add Proactive Discussion of Discharge Antibiotics<br>Start Conversations by [DATE] | Determine messages about discharge antibiotics that can be integrated into already-existing daily audit and feedback | ASP Lead; ASP staff;<br>Floor Pharmacist                       | Complete by [DATE]       | -Additional effort needed from ASP<br>-Some reluctance to add work   | -Find ways to incorporate into existing ASP workflows<br>-Engage floor pharmacists as champions                      |
|                                                                                                                 | Set a goal for number of proactive discussions to have per week                                                      | ASP lead;<br>Physician Lead;<br>other ASP stakeholders         | Complete by [DATE]       | -Group may disagree with how many recommendations to target          | -Select an initial goal, modify up or down based on experience                                                       |
